# Supplementary material
Source: ML conference proceedings conference paper supplement (https://openaccess.thecvf.com/content/CVPR_2020/html/Zhou_DaST_Data-Free_Substitute_CVPR_2020_paper.html)
Supplement: Supplementary file 1 [file Zhou_DaST_Data-Free_Substitute_CVPR_2020_supplemental.zip]

## Appendix A

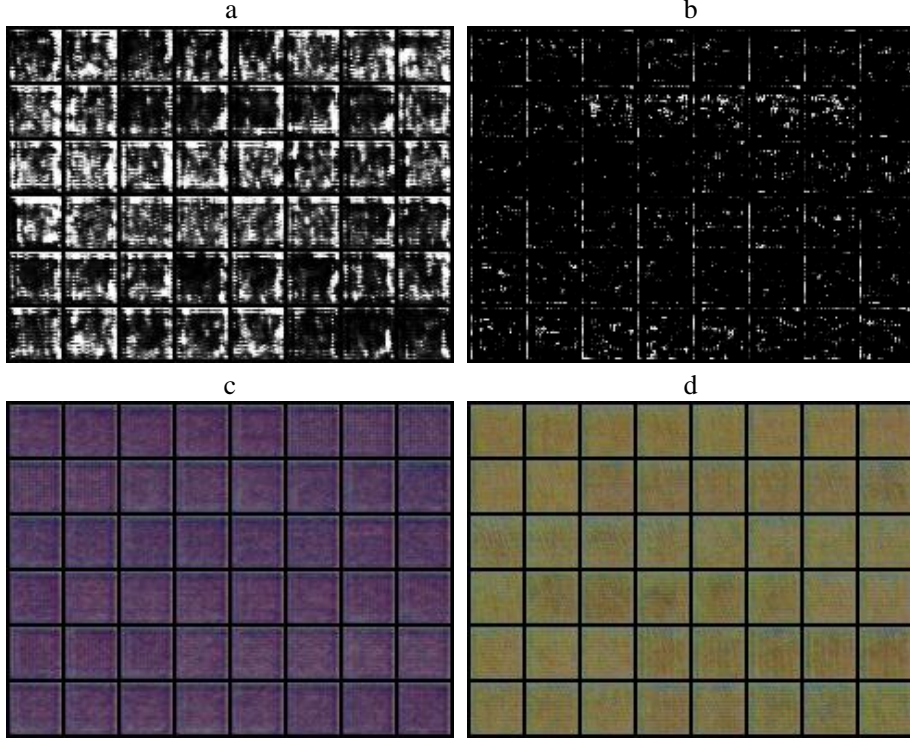

Figure 1: Visualization of the synthetic samples generated by the generator in DaST. These samples are produced by the GANs which are converged in training. We generate 48 samples for each scenario. a and b: samples generated by DaST in label-only and probability-only attack scenario on MNIST dataset (the medium network is the target model), respectively. c and d: samples generated by DaST in label-only and probability-only attack scenario on CIFAR-10 dataset (VGG-16 is the target model), respectively.

## Appendix B

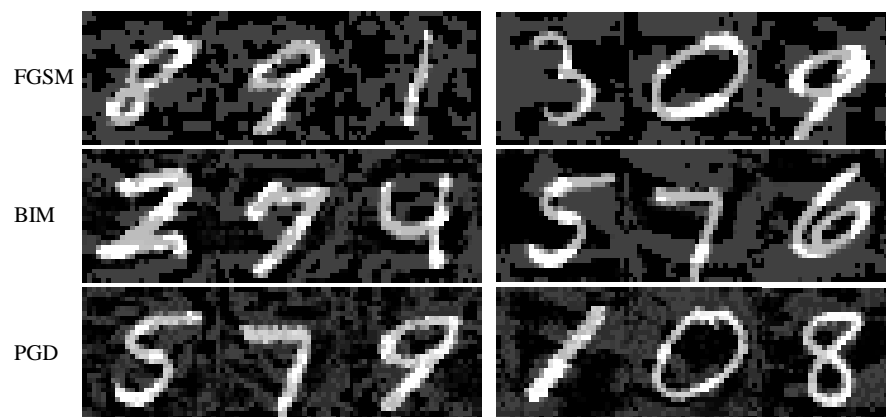

Figure 2: Visualization of the adversarial examples generated by DaST for attacking the medium model on MNIST. We only show the adversarial examples which can fool the model successfully. Left part: examples generated by DaST-P. Right part: examples generated by DaST-L.), respectively.

## Appendix C

Table 1: Network architectures for MNIST. Convolutional kernel  $(A \times B, C)$  denotes the kernel size and channel number, respectively.

| ConvBlock                   | Small net                    | Medium net                   | Large net                    |
|-----------------------------|------------------------------|------------------------------|------------------------------|
| ConvLayer $(A \times B, C)$ | ConvBlock $(5 \times 5, 20)$ | ConvBlock $(5 \times 5, 20)$ | ConvBlock $(5 \times 5, 20)$ |
| ReLU                        | ConvBlock $(5 \times 5, 50)$ | ConvBlock $(5 \times 5, 50)$ | ConvBlock $(5 \times 5, 50)$ |
| MaxPooling $(2 \times 2)$   | DenseLayer                   | ConvBlock $(3 \times 3, 50)$ | ConvBlock $(3 \times 3, 50)$ |
|                             | ReLU                         | DenseLayer                   | ConvBlock $(3 \times 3, 50)$ |
|                             | DenseLayer                   | ReLU                         | DenseLayer                   |
|                             | Sigmoid                      | DenseLayer                   | ReLU                         |
|                             |                              | Sigmoid                      | DenseLayer                   |
|                             |                              |                              | Sigmoid                      |
