# Supplementary material
Source: ML conference proceedings conference paper supplement (https://openaccess.thecvf.com/content/CVPR_2020/html/Zhou_DaST_Data-Free_Substitute_CVPR_2020_paper.html)
Supplement: Supplementary file 2 [file Zhou_DaST_Data-Free_Substitute_CVPR_2020_supplemental.zip]

Archive with 1 entries (1 files):
- 07938-supp.pdf
